# Supplementary material for: Feasibility of Encord Artificial Intelligence Annotation of Arterial Duplex Ultrasound Images
Source: MDPI journal article supplement (doi:10.3390/diagnostics14010046), 2023-12-25

**Supplemental Figure S1.** Example Screenshot of Encord platform training log for the 80 image model. The upper left hand corner is labeled the model with segmentation, PyTorch, and Mask Region Based Convolutional Neural Networks (MASK\_RCNN). The graph displayed shows model loss on the y axis and Epoch on the x axis.

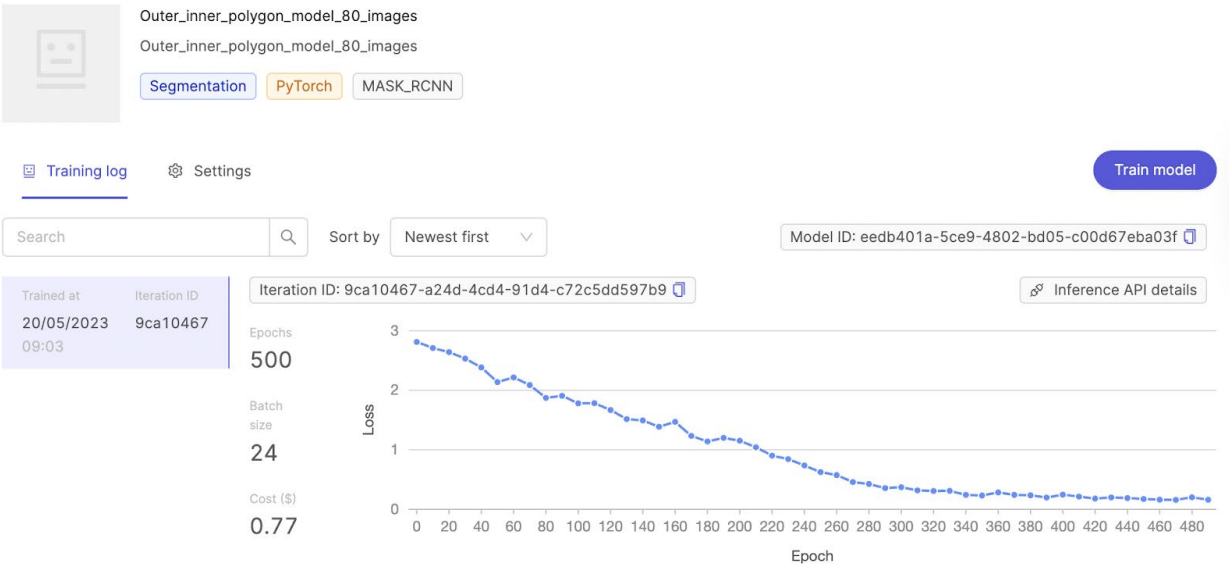

Supplement: s1 [file s1]
